# Supplementary material for: Human exposure to phthalate esters via ingestion of municipal drinking water from automatic water purifiers: levels, sources, and risks
Source: Royal Society of Chemistry journal article supplement (doi:10.1039/d2ew00535b), 2022-01-01
Supplement: d2ew00535b1.pdf [file d2ew00535b1.pdf]

## Supporting Information

### Human exposure to phthalic acid esters via ingestion of municipal drinking water from automatic water purifiers: levels, sources, and risks

Ya Yang <sup>a</sup>, Linlin Song <sup>a</sup>, Zhiliang Zhu <sup>a, b</sup>, Yanling Qiu <sup>a, b</sup>, Jianfu Zhao <sup>a, b</sup>, Qinghui

Huang <sup>a, b, \*</sup> and Ake Bergman <sup>c, d</sup>

<sup>a</sup> Key Laboratory of Yangtze River Water Environment of the Ministry of Education,  
College of Environmental Science and Engineering, Tongji University, Shanghai  
200092, China

<sup>b</sup> Shanghai Institute of Pollution Control and Ecological Security, Shanghai 200092,  
China.

<sup>c</sup> Department of Environmental Science (ACES), Stockholm University, Stockholm  
106 91, Sweden

<sup>d</sup> Department of Science and Technology, Örebro University, SE-701 82 Örebro,  
Sweden

\*Corresponding author:

Qinghui Huang, E-mail: [qhhuang@tongji.edu.cn](mailto:qhhuang@tongji.edu.cn);

18 pages, including 9 Tables and 5 Figures.

#### S1. Experimental method of purification materials

Tables S1-S9

Figures

S1-S5

## **S1. Experimental method of purification materials**

Approximately 2 g filter material including high-precision micro-processing filter (HPMF) and granular activated carbon (GAC) spiked with surrogate standards (i.e., Butyl benzyl phthalate (BBP)-D4, DEHP-D4 250 ng, and then spiked with extracted by Soxhlet extraction with 150 mL hexane (HEX) lasting for 12 hours. After that, the extraction was rotary evaporated to 1mL, and then loading in the Florial cartridge. Briefly, the cartridges were preconditioned with 25 mL hex: acetone (v: v = 1:1). Then, samples were evaporated to 1 mL under a gentle nitrogen flow. The residue was dissolved with n-hexane (Hex) for gas chromatography-mass spectrometry (GC-MS) analysis.

Table S1 Compound dependent operation parameters of phthalate esters (PAEs).

| Compounds | Retention Time (min) | Quantification ions | Quantitative ions | LOD (ng/L) | LOQ (ng/L) |
|-----------|----------------------|---------------------|-------------------|------------|------------|
| DBP       | 7.87                 | 149, 150            | 149               | 1.13       | 1.14       |
| DIBP      | 7.24                 | 149, 150            | 149               | 1.13       | 1.14       |
| DEP       | 5.65                 | 149, 177            | 149               | 0.14       | 0.16       |
| DMP       | 4.82                 | 163, 77             | 163               | 0.18       | 0.19       |
| DEHP      | 14.21                | 167, 167            | 167               | 0.47       | 0.52       |
| DMEP      | 8.12                 | 59, 58              | 59                | 0.70       | 1.30       |
| DNP       | 21.05                | 149, 293            | 149               | 0.02       | 0.05       |
| DHP       | 14.22                | 41, 149             | 41                | 7.38       | 8.13       |
| DHXP      | 11.52                | 149, 150            | 149               | 0.86       | 0.87       |
| DINP      | 18.97                | 149, 207            | 149               | 1.86       | 2.04       |
| DPP       | 9.43                 | 149, 153            | 149               | 0.68       | 0.70       |
| BMPP      | 8.73                 | 84, 149             | 85                | 1.83       | 1.99       |
| DnOP      | 17.46                | 149, 279            | 85                | 0.93       | 0.95       |
| DCHP      | 14.02                | 149, 167            | 149               | 0.44       | 0.46       |
| DPhP      | 14.40                | 225, 77             | 225               | 0.72       | 0.74       |
| DBEP      | 13.23                | 149, 57             | 149               | 5.76       | 5.88       |
| DIPP      | 8.71                 | 149, 71             | 71                | 2.52       | 2.65       |
| DAP       | 6.53                 | 149, 189            | 149               | 4.83       | 4.87       |
| BBP       | 11.68                | 149, 91             | 149               | 2.11       | 2.15       |
| DIPrP     | 6.01                 | 149, 150            | 149               | 1.18       | 1.19       |
| DPrP      | 6.68                 | 149, 150            | 149               | 1.02       | 1.03       |
| DEEP      | 9.04                 | 72, 149             | 72                | 2.71       | 2.79       |
| DEHP-D4   | 14.18                | 153, 149            | 153               | -          | -          |
| BBP-D4    | 11.65                | 153, 149            | 153               | -          | -          |

LOD: limit of detection; LOQ: limit of quantification.

-not

detected.

Table S2 Details of tap water (TW), water vending machine (WVM), and water boiling machine (WBM) sampling information.

| Site No.    | Site | Time   | Sample | Site No. | Site | Time   | Sample |
|-------------|------|--------|--------|----------|------|--------|--------|
| PD-WVM-GH-1 | PD   | 09.21  | WVM    | N-WBM-1  | N    | 06.09  | WBM    |
| PD-WVM-GH-2 | PD   | 09.21  | WVM    | N-WBM-2  | N    | 06.09  | WBM    |
| PD-WVM-GH-3 | PD   | 09.21  | WVM    | N-WBM-3  | N    | 06.09  | WBM    |
| FM-WVM-GH-4 | FM   | 10.28  | WVM    | S-WBM-1  | S    | 09.08  | WBM    |
| S-WVM-JB-1  | S    | 09.08  | WVM    | S-WBM-2  | S    | 09.08  | WBM    |
| S-WVM-JB-2  | S    | 09.08  | WVM    | S-WBM-3  | S    | 09.08  | WBM    |
| N-WVM-YSK-1 | N    | 10.20  | WVM    | S-WBM-4  | S    | 09.08  | WBM    |
| N-WVM-YSK-2 | N    | 10.20  | WVM    | S-WBM-5  | S    | 09.08  | WBM    |
| N-WVM-YSK-3 | N    | 06.05  | WVM    | S-WBM-6  | S    | 09.08  | WBM    |
| N-WVM-QM-1  | N    | 06..05 | WVM    | PD-WBM-5 | PD   | 09.21  | WBM    |
| PD-WVM-QM-2 | PD   | 09.21  | WVM    | N-WBM-5  | N    | 09.17  | WBM    |
| S-WVM-QM-3  | S    | 09.08  | WVM    | PD-WBM-1 | PD   | 09.21  | WBM    |
| S-WVM-QM-4  | S    | 09.08  | WVM    | PD-WBM-2 | PD   | 09.21  | WBM    |
| FM-WVM-QM-1 | FM   | 10.28  | WVM    | PD-WBM-3 | PD   | 09.21  | WBM    |
| FM-WVM-QM-2 | FM   | 10.28  | WVM    | PD-WBM-4 | PD   | 09.21  | WBM    |
| N-WVM-EJ-1  | N    | 06.05  | WVM    | N-WBM-6  | N    | 10.20  | WBM    |
| N-WVM-EJ-2  | N    | 06.05  | WVM    | FM-WBM-1 | FM   | 10.28  | WBM    |
| PD-WVM-EJ-3 | PD   | 09.21  | WVM    | FM-WBM-2 | FM   | 10.28  | WBM    |
| S-WVM-EJ-4  | S    | 09.08  | WVM    | FM-WBM-3 | FM   | 10.28  | WBM    |
| S-WVM-EJ-5  | S    | 09.08  | WVM    | FM-WBM-4 | FM   | 10.28  | WBM    |
| FM-WVM-EJ-6 | FM   | 10.28  | WVM    | FM-WBM-5 | FM   | 11..03 | WBM    |
| FM-WVM-EJ-7 | FM   | 10.28  | WVM    | N-TW-1   | N    | 06.05  | TW     |
| N-WVM-CG-1  | N    | 06.05  | WVM    | N-TW-2   | N    | 06.09  | TW     |
| FM-WVM-CG-5 | FM   | 10.28  | WVM    | N-TW-3   | N    | 06.09  | TW     |
| PD-WVM-CG-2 | PD   | 09.21  | WVM    | N-TW-4   | N    | 06.09  | TW     |
| PD-WVM-CG-3 | PD   | 09.21  | WVM    | N-TW-5   | N    | 06.09  | TW     |
| S-WVM-CG-4  | S    | 09.08  | WVM    | S-TW-1   | S    | 09.08  | TW     |
| FM-WVM-CG-6 | FM   | 10.28  | WVM    | S-TW-2   | S    | 09.08  | TW     |
| N-WVM-AM-1  | N    | 06.05  | WVM    | PD-TW-1  | PD   | 09.21  | TW     |
| PD-WVM-AM-2 | PD   | 09.21  | WVM    | PD-TW-2  | PD   | 09.21  | TW     |
| S-WVM-AM-3  | S    | 09.08  | WVM    | PD-TW-3  | PD   | 09.21  | TW     |
| S-WVM-AM-4  | S    | 09.08  | WVM    | PD-TW-4  | PD   | 09.21  | TW     |
| FM-WVM-AM-5 | FM   | 10.28  | WVM    | FM-TW-1  | FM   | 10.28  | TW     |
| N-WVM-HY-1  | N    | 06.05  | WVM    | FM-TW-2  | FM   | 10.28  | TW     |
| N-WVM-HY-2  | N    | 06.05  | WVM    | FM-TW-3  | FM   | 10.28  | TW     |
| PD-WVM-HY-3 | PD   | 09.21  | WVM    | FM-TW-4  | FM   | 10.28  | TW     |
| S-WVM-HY-4  | S    | 09.08  | WVM    |          |      |        |        |
| S-WVM-HY-5  | S    | 09.08  | WVM    |          |      |        |        |
| FM-WVM-HY-6 | FM   | 10.28  | WVM    |          |      |        |        |

Table S3 Detection frequency of 22 phthalates in TW, WVM, and WBM samples

| <b>DF (%)</b> | <b>TW (n=15)</b> | <b>WBM (n=21)</b> | <b>WVM (n=39)</b> |
|---------------|------------------|-------------------|-------------------|
| DBP           | 87               | 95                | 100               |
| DIBP          | 80               | 95                | 100               |
| DEP           | 80               | 80                | 77                |
| DMP           | 33               | 80                | 74                |
| DEHP          | 40               | 75                | 74                |
| DMEP          | 47               | 50                | 74                |
| DHP           | 40               | 55                | 77                |
| DNP           | 20               | 35                | 49                |
| DHXP          | 0                | 10                | 13                |
| DINP          | 7                | 0                 | 8                 |
| DPP           | 0                | 0                 | 8                 |
| BMPP          | 10               | 50                | 5                 |
| DnOP          | 0                | 10                | 3                 |
| DCHP          | 0                | 0                 | 0                 |
| DPhP          | 20               | 0                 | 8                 |
| DBEP          | 0                | 15                | 3                 |
| DIPP          | 7                | 0                 | 0                 |
| DAP           | 0                | 0                 | 0                 |
| BBP           | 0                | 0                 | 0                 |
| DIPrP         | 0                | 0                 | 0                 |
| DPrP          | 0                | 0                 | 0                 |
| DEEP          | 87               | 0                 | 0                 |

Table S4 Detailed information of 22 phthalates

| Compounds | CAS number | Molecular Formula <sup>a</sup>                             | Mass <sup>b</sup> (g/mol) | log $K_{ow}$ <sup>b</sup> | Vapor Pressure <sup>c</sup> | Water Solution <sup>c</sup> |
|-----------|------------|------------------------------------------------------------|---------------------------|---------------------------|-----------------------------|-----------------------------|
| DBP       | 84-74-2    | C <sub>6</sub> H <sub>22</sub> O <sub>4</sub>              | 278                       | 4.50                      | 2.01E-05                    | 4.68E-05                    |
| DIBP      | 84-69-5    | C <sub>6</sub> H <sub>22</sub> O <sub>4</sub>              | 278                       | 4.11                      | 4.76E-05                    | 2.23E-05                    |
| DEP       | 84-66-2    | C <sub>12</sub> H <sub>14</sub> O <sub>4</sub>             | 222                       | 2.47                      | 2.10E-03                    | 4.86E-03                    |
| DMP       | 131-11-3   | C <sub>10</sub> H <sub>10</sub> O <sub>4</sub>             | 194                       | 1.60                      | 3.08E-03                    | 2.10E-02                    |
| DEHP      | 117-81-7   | C <sub>24</sub> H <sub>8</sub> O <sub>4</sub> <sup>a</sup> | 390                       | 7.60                      | 1.42E-07                    | 1.08E-07                    |
| DMEP      | 117-82-8   | C <sub>14</sub> H <sub>18</sub> O <sub>6</sub>             | 282                       | 1.11                      | 2.28E-04                    | 3.00E-02                    |
| DNP       | 84-76-4    | C <sub>26</sub> H <sub>42</sub> O <sub>4</sub>             | 418                       | 9.52                      | 5.14E-07                    | 1.73E-05                    |
| DHP       | 3648-21-3  | C <sub>22</sub> H <sub>34</sub> O <sub>4</sub>             | 362                       | 7.56                      | 2.07E-06                    | 5.10E-06                    |
| DHXP      | 84-75-3    | C <sub>20</sub> H <sub>30</sub> O <sub>4</sub>             | 334                       | 6.82                      | 1.40E-05                    | 1.49E-07                    |
| DINP      | 28553-12-0 | C <sub>26</sub> H <sub>42</sub> O <sub>4</sub>             | 418                       | 9.37                      | 5.40E-07                    | 4.78E-07                    |
| DPP       | 131-18-0   | C <sub>18</sub> H <sub>26</sub> O <sub>4</sub>             | 306                       | 5.62                      | 1.50E-05                    | 2.60E-06                    |
| BMPP      | 84-63-9    | C <sub>20</sub> H <sub>30</sub> O <sub>4</sub>             | 334                       | 5.76                      | 3.46E-04                    | 3.50E-05                    |
| DnOP      | 117-84-0   | C <sub>24</sub> H <sub>38</sub> O <sub>4</sub>             | 390                       | 8.10                      | 1.00E-07                    | 5.64E-08                    |
| DCHP      | 84-61-7    | C <sub>20</sub> H <sub>26</sub> O <sub>4</sub>             | 330                       | 6.20                      | 8.69E-07                    | 1.21E-05                    |
| DPhP      | 84-62-8    | C <sub>20</sub> H <sub>14</sub> O <sub>4</sub>             | 318                       | 4.18                      | 1.61E-07                    | 2.57E-07                    |
| DBEP      | 117-83-9   | C <sub>20</sub> H <sub>30</sub> O <sub>6</sub>             | 366                       | 4.06                      | 2.17E-03                    | 8.19E-04                    |
| DIPP      | 605-50-5   | C <sub>18</sub> H <sub>26</sub> O <sub>4</sub>             | 306                       | 5.17                      | 1.27E-04                    | 2.20E-05                    |
| DAP       | 131-17-9   | C <sub>14</sub> H <sub>14</sub> O <sub>4</sub>             | 246                       | 3.23                      | 1.16E-03                    | 7.39E-04                    |
| BBP       | 85-68-7    | C <sub>19</sub> H <sub>20</sub> O <sub>4</sub>             | 312                       | 4.73                      | 8.60E-06                    | 8.61E-06                    |
| DIPrP     | 605-45-8   | C <sub>14</sub> H <sub>18</sub> O <sub>4</sub>             | 250                       | 3.27                      | 2.63E-03                    | 6.78E-04                    |
| DPrP      | 131-16-8   | C <sub>14</sub> H <sub>18</sub> O <sub>4</sub>             | 250                       | 3.63                      | 1.32E-04                    | 4.32E-04                    |
| DEEP      | 605-54-9   | C <sub>16</sub> H <sub>22</sub> O <sub>6</sub>             | 310                       | 2.30                      | 2.54E-05                    | 2.33E-03                    |

<sup>a</sup> Molecular formula of PAEs is from (Gani et al., 2016).

<sup>b</sup> Mass (g/mol), log $K_{ow}$ , were obtained from PubChem (PubChem).

<sup>c</sup> Vapor pressure (mmHg) and water solution (mol/L) were obtained from the CompTox Chemicals Dashboard (Chemicals Dashboard).

Table S5 Water treatment processes of 24 h water vending machine

| Brand <sup>a</sup> | Water treatment processes <sup>b</sup>    |
|--------------------|-------------------------------------------|
| GH                 | PAF-CB-HPMF-ROF-RIF-UVS                   |
| JB                 | PAF-GAC-BAC-RIF-ROF-HPMF-EMM-OS           |
| YSK                | PPFC-GAC-GACF-PPFC-ROF-ACF-OS             |
| QM                 | PPFC (5 μm)-GAC-CB-ROF-OS-UVS-CB-CSTR     |
| EJ                 | PPFC (5 μm)-GAC-GACF-PPFC (1 μm)-ROF-UVS  |
| CG                 | PAF-ACF-HPMF-ROF-HPMF                     |
| AM                 | PPFC (5 μm)-ACF-UF (1 μm)-ROF-NCF-AOS-UVS |
| HY                 | PAF-ACF-HPMF-ROF-ACF-OS                   |

<sup>a</sup>Brands: GH: Gang Hui; JB: Jing Bo; YSK: Yi Sikai; QM: Yi Lian; EJ: Qing Lang; CG: Yi Quan; AM: Qi Jia; HY: Han Ying.

**Pretreatment filter:** PAF: pretreatment automatic filter; PPFC: polypropylene filter core (5 μm and 1 μm); HPMF: high-precision micro-processing filter.

**Activated carbon adsorption (AC):** ACF: activated carbon filter; CB: carbon block; GAC: granular activated carbon; BAC: bar activated carbon; CACF: compressed activated carbon filter.

**Filtration:** ROF: reverse osmosis filter; NCF: nano crystal filter.

**Sterilization:** UVS: UV sterilization; AOS: activated oxygen sterilization; OS: ozone sterilization.

**Other processes:** EMM: energy mine magnetize; CSTR: coconut shell taste regulator, RIF: rear impurity filter.

Table S6 Exposure parameters of men and women for the intake of drinking water

| IR (L/kg bw/day) | Mean  |
|------------------|-------|
| <1 months        | 0.052 |
| 1-3 months       | 0.048 |
| 3-6 months       | 0.052 |
| 6-12 months      | 0.041 |
| 1-2 years        | 0.023 |
| 2-3 years        | 0.023 |
| 3-6 years        | 0.018 |
| 6-11 years       | 0.014 |
| 11-16 years      | 0.010 |
| 16-18 years      | 0.009 |
| 18-21 years      | 0.009 |
| <21 years        | 0.013 |
| 21-65 years      | 0.014 |
| All years        | 0.014 |

Ingestion rates (IR, L/kg bw/day) were obtained from USEPA Exposure factors handbook (USEPA, 2011).



Table S7 Comparison of PAE concentrations in source water of the Yangtze River and Taihu lake from previous studies.

| River basin      | Predominant congener | Range (ng/L)                               | Median(ng/L) | Reference          |
|------------------|----------------------|--------------------------------------------|--------------|--------------------|
| Yangtze river    | DBP                  | 94.2-5.76×10 <sup>6</sup>                  | 473          | Zhang et al., 2022 |
| Taizhou section  | DEP                  | 5.6-194                                    | 16.1         |                    |
|                  | DMEP                 | 11.7-212                                   | 76.2         |                    |
| Yangtze river    | Σ <sub>16</sub> PAEs | 2.63×10 <sup>3</sup> -2.29×10 <sup>4</sup> | -            | Zhang et al., 2020 |
|                  | DIBP                 | -                                          | -            |                    |
|                  | DnBP                 | -                                          | -            |                    |
|                  | DEHP                 | -                                          | -            |                    |
| Yangtze estuary  |                      |                                            |              | Deng et al., 2021  |
| Wetland sediment | Σ <sub>8</sub> PAEs  | 3.9-253                                    | -            |                    |
| Hangzhou Bay     | Σ <sub>10</sub> PAEs | 2.68×10 <sup>4</sup> -4.24×10 <sup>6</sup> | -            | Wang et al., 2021  |
|                  | DiBP, DnBP, DEHP     | -                                          | -            |                    |
| Yangtze river    | DBP, DEHP            | 61-2.86×10 <sup>4</sup>                    |              | Zhang et al., 2012 |
| Taihu lake       |                      |                                            |              |                    |
| Surface sediment | Σ <sub>10</sub> PAEs | 1.2×10 <sup>3</sup> -1.87×10 <sup>4</sup>  | -            | Zhang et al., 2021 |
| Core sediment    | Σ <sub>10</sub> PAEs | 0.23×10 <sup>3</sup> -5.22×10 <sup>4</sup> | -            |                    |
|                  | DBP, DIBP            |                                            |              |                    |
| Taihu lake       |                      |                                            |              | Luo et al., 2021   |
| Surface water    | DBP, DEHP, DIBP      | ND-1.61×10 <sup>4</sup>                    | -            |                    |
| Taihu lake       | DBP, DEHP            | 7.4×10 <sup>2</sup> -1.3×10 <sup>4</sup>   | -            | Gao et al., 2019   |
| Taihu lake       | Σ <sub>4</sub> PAEs  |                                            |              | Shi et al., 2012   |
|                  | DBP                  | 2.8×10 <sup>3</sup> -1.6×10 <sup>6</sup>   | -            |                    |
|                  | DEHP                 | 0.11-1.41×10 <sup>3</sup>                  | -            |                    |

-not

found

Table S8 Comparison of PAE concentrations and compositions in this study and previous studies.

| Matrix | Predominant Chemicals     | Region          | Range (ng/L)                            | Mean                 | Median   | Target | Reference                |
|--------|---------------------------|-----------------|-----------------------------------------|----------------------|----------|--------|--------------------------|
| TW     | DIBP, DBP, DEP, DMP, DEHP | China           | 0-447                                   | 97                   | 121±104  | 22     | This study               |
| TW     | DMP, DEP, DEHP, DBP       | Tehran, Iran    | 450-1080                                | -                    | 730      | 12     | Abtahi et al., 2019      |
| TW     | DEP, DMP, DnBP            | Delhi, India    | N.D.-5765                               | -                    | -        | 13     | Chakraborty et al., 2022 |
| TW     | DEHP, DBP                 | Tianjin, China  | 2940-1.39×10 <sup>4</sup>               | 1.08×10 <sup>4</sup> | -        | 6      | Ji et al., 2014          |
| TW     | DEHP                      | Tianjin, China  | -                                       | -                    | 2409±391 | 6      | Wang et al., 2021        |
| TW     |                           | Shanghai, China | -                                       | -                    | 1037     | 8      | Xue et al., 2021         |
| TW     | DBP, DIBP                 | French          | DBP: 1300, DIBP: 1650                   | -                    |          | 9      | Bach et al., 2020        |
| TW     | DEHP, DIBP, DBP           | Vietnam         | 2100-1.8×10 <sup>4</sup>                | -                    | 9270     | 10     | Le et al., 2021          |
| TW     | DBP, DEHP, nBiBP          | Moscow, Russian | 51.1-84.5                               | -                    | -        | 5      | Eremina et al., 2016     |
| TW     | DMP, DEP, BBP             | Nanjing, China  | N.D.-527.8                              | -                    | -        | 4      | Li et al., 2018          |
| TW     | DBP                       | Spain           | 430-909                                 | -                    | -        | 5      | Morueco et al., 2014     |
| TW     | DEP, DMP                  | Hangzhou, China | 25-80                                   | 55                   | -        | 4      | Jin et al., 2019         |
| BW     | DEHP, DBP                 | Egypt           | N.D.-469                                | -                    | -        | 6      | Zaki et al., 2018        |
| WVM    | DBP, DEHP, BBP            | Tianjin, China  | -                                       | -                    | 1960±160 | 6      | Wang et al., 2021        |
| BW     | DMEP, DEP, DBP            | Pakistan        | 9×10 <sup>5</sup> -1.13×10 <sup>5</sup> | -                    | -        | 9      | Surhio et al., 2017      |
| BW     | DBP                       | Malaysia        | 680-1110                                | -                    | -        | 5      | Hazira et al., 2021      |
| BW     | DEHP, DIBP, DBP           | Dalian, China   | 770-4.8×10 <sup>4</sup>                 | -                    | -        | 15     | Xue et al., 2021         |
| BW     | DBP                       | Beijing, China  | 10-510                                  | -                    | -        | 21     | Li et al., 2018          |

Table S9 The estimated daily intakes of PAEs (ng/kg/day) via ingestion of TW, WVM, and WBM water in two exposure scenarios.

|       |         | DBP            |                | DIBP |       | DEP  |      | DMP  |      | DEHP |      | DMEP |      | DHP  |      | $\Sigma_{22}$ PAEs |       |
|-------|---------|----------------|----------------|------|-------|------|------|------|------|------|------|------|------|------|------|--------------------|-------|
|       |         | N <sup>a</sup> | H <sup>b</sup> | N    | H     | N    | H    | N    | H    | N    | H    | N    | H    | N    | H    | N                  | H     |
| TW    | <1 m    | 0.73           | 1.16           | 1.16 | 4.50  | 0.18 | 0.35 | 0.55 | 1.25 | 0.00 | 1.71 | 0.00 | 0.94 | 0.00 | 2.53 | 3.98               | 10.81 |
|       | 1-3 m   | 0.68           | 1.07           | 1.07 | 4.15  | 0.17 | 0.32 | 0.50 | 1.16 | 0.00 | 1.58 | 0.00 | 0.87 | 0.00 | 2.34 | 3.67               | 9.98  |
|       | 3-6 m   | 0.73           | 1.16           | 1.16 | 4.50  | 0.18 | 0.35 | 0.55 | 1.25 | 0.00 | 1.71 | 0.00 | 0.94 | 0.00 | 2.53 | 3.98               | 10.81 |
|       | 6-12 m  | 0.58           | 0.91           | 0.91 | 3.55  | 0.14 | 0.28 | 0.43 | 0.99 | 0.00 | 1.35 | 0.00 | 0.74 | 0.00 | 2.00 | 3.14               | 8.53  |
|       | 1-2 y   | 0.32           | 0.51           | 0.51 | 1.99  | 0.08 | 0.16 | 0.24 | 0.55 | 0.00 | 0.76 | 0.00 | 0.42 | 0.00 | 1.12 | 1.76               | 4.78  |
|       | 2-3 y   | 0.32           | 0.51           | 0.51 | 1.99  | 0.08 | 0.16 | 0.24 | 0.55 | 0.00 | 0.76 | 0.00 | 0.42 | 0.00 | 1.12 | 1.76               | 4.78  |
|       | 3-6 y   | 0.25           | 0.40           | 0.40 | 1.56  | 0.06 | 0.12 | 0.19 | 0.43 | 0.00 | 0.59 | 0.00 | 0.33 | 0.00 | 0.88 | 1.38               | 3.74  |
|       | 6-11 y  | 0.20           | 0.31           | 0.31 | 1.21  | 0.05 | 0.09 | 0.15 | 0.34 | 0.00 | 0.46 | 0.00 | 0.25 | 0.00 | 0.68 | 1.07               | 2.91  |
|       | 11-16 y | 0.14           | 0.22           | 0.22 | 0.87  | 0.03 | 0.07 | 0.10 | 0.24 | 0.00 | 0.33 | 0.00 | 0.18 | 0.00 | 0.49 | 0.77               | 2.08  |
|       | 16-18 y | 0.13           | 0.20           | 0.20 | 0.78  | 0.03 | 0.06 | 0.09 | 0.22 | 0.00 | 0.30 | 0.00 | 0.16 | 0.00 | 0.44 | 0.69               | 1.87  |
|       | 18-21 y | 0.13           | 0.20           | 0.20 | 0.78  | 0.03 | 0.06 | 0.09 | 0.22 | 0.00 | 0.30 | 0.00 | 0.16 | 0.00 | 0.44 | 0.69               | 1.87  |
|       | <21 y   | 0.18           | 0.29           | 0.29 | 1.12  | 0.05 | 0.09 | 0.14 | 0.31 | 0.00 | 0.43 | 0.00 | 0.23 | 0.00 | 0.63 | 0.99               | 2.70  |
|       | 21-65 y | 0.20           | 0.31           | 0.31 | 1.21  | 0.05 | 0.09 | 0.15 | 0.34 | 0.00 | 0.46 | 0.00 | 0.25 | 0.00 | 0.68 | 1.07               | 2.91  |
| All y | 0.20    | 0.31           | 0.31           | 1.21 | 0.05  | 0.09 | 0.15 | 0.34 | 0.00 | 0.46 | 0.00 | 0.25 | 0.00 | 0.68 | 1.07 | 2.91               |       |
| WVM   | <1 m    | 0.74           | 5.41           | 1.38 | 17.03 | 0.02 | 0.08 | 0.05 | 0.26 | 0.40 | 2.70 | 0.51 | 2.39 | 1.21 | 2.34 | 6.84               | 34.30 |
|       | 1-3 m   | 0.68           | 5.00           | 1.28 | 15.72 | 0.02 | 0.07 | 0.05 | 0.24 | 0.37 | 2.50 | 0.48 | 2.21 | 1.12 | 2.16 | 6.31               | 31.66 |
|       | 3-6 m   | 0.74           | 5.41           | 1.38 | 17.03 | 0.02 | 0.08 | 0.05 | 0.26 | 0.40 | 2.70 | 0.51 | 2.39 | 1.21 | 2.34 | 6.84               | 34.30 |
|       | 6-12 m  | 0.58           | 4.27           | 1.09 | 13.43 | 0.01 | 0.06 | 0.04 | 0.21 | 0.31 | 2.13 | 0.41 | 1.88 | 0.96 | 1.84 | 5.39               | 27.05 |
|       | 1-2 y   | 0.33           | 2.39           | 0.61 | 7.53  | 0.01 | 0.03 | 0.02 | 0.12 | 0.18 | 1.20 | 0.23 | 1.06 | 0.54 | 1.03 | 3.02               | 15.17 |
|       | 2-3 y   | 0.33           | 2.39           | 0.61 | 7.53  | 0.01 | 0.03 | 0.02 | 0.12 | 0.18 | 1.20 | 0.23 | 1.06 | 0.54 | 1.03 | 3.02               | 15.17 |
|       | 3-6 y   | 0.26           | 1.87           | 0.48 | 5.89  | 0.01 | 0.03 | 0.02 | 0.09 | 0.14 | 0.94 | 0.18 | 0.83 | 0.42 | 0.81 | 2.37               | 11.87 |
|       | 6-11 y  | 0.20           | 1.46           | 0.37 | 4.58  | 0.00 | 0.02 | 0.01 | 0.07 | 0.11 | 0.73 | 0.14 | 0.64 | 0.33 | 0.63 | 1.84               | 9.24  |

|       |         |      |      |      |      |      |      |      |      |      |      |      |      |      |      |      |       |
|-------|---------|------|------|------|------|------|------|------|------|------|------|------|------|------|------|------|-------|
|       | 11-16 y | 0.14 | 1.04 | 0.27 | 3.27 | 0.00 | 0.01 | 0.01 | 0.05 | 0.08 | 0.52 | 0.10 | 0.46 | 0.23 | 0.45 | 1.32 | 6.60  |
|       | 16-18 y | 0.13 | 0.94 | 0.24 | 2.95 | 0.00 | 0.01 | 0.01 | 0.05 | 0.07 | 0.47 | 0.09 | 0.41 | 0.21 | 0.40 | 1.18 | 5.94  |
|       | 18-21 y | 0.13 | 0.94 | 0.24 | 2.95 | 0.00 | 0.01 | 0.01 | 0.05 | 0.07 | 0.47 | 0.09 | 0.41 | 0.21 | 0.40 | 1.18 | 5.94  |
|       | <21 y   | 0.18 | 1.35 | 0.35 | 4.26 | 0.00 | 0.02 | 0.01 | 0.07 | 0.10 | 0.68 | 0.13 | 0.60 | 0.30 | 0.58 | 1.71 | 8.58  |
|       | 21-65 y | 0.20 | 1.46 | 0.37 | 4.58 | 0.00 | 0.02 | 0.01 | 0.07 | 0.11 | 0.73 | 0.14 | 0.64 | 0.33 | 0.63 | 1.84 | 9.24  |
|       | All y   | 0.20 | 1.46 | 0.37 | 4.58 | 0.00 | 0.02 | 0.01 | 0.07 | 0.11 | 0.73 | 0.14 | 0.64 | 0.33 | 0.63 | 1.84 | 9.24  |
| WBM   | <1 m    | 0.74 | 6.73 | 1.20 | 3.26 | 0.09 | 0.37 | 0.30 | 1.15 | 0.15 | 0.83 | 0.26 | 1.56 | 1.05 | 2.74 | 4.24 | 22.44 |
|       | 1-3 m   | 0.69 | 6.21 | 1.11 | 3.01 | 0.09 | 0.34 | 0.28 | 1.06 | 0.14 | 0.77 | 0.24 | 1.44 | 0.97 | 2.53 | 3.92 | 20.71 |
|       | 3-6 m   | 0.74 | 6.73 | 1.20 | 3.26 | 0.09 | 0.37 | 0.30 | 1.15 | 0.15 | 0.83 | 0.26 | 1.56 | 1.05 | 2.74 | 4.24 | 22.44 |
|       | 6-12 m  | 0.59 | 5.31 | 0.94 | 2.57 | 0.07 | 0.29 | 0.24 | 0.91 | 0.12 | 0.66 | 0.21 | 1.23 | 0.83 | 2.16 | 3.34 | 17.69 |
|       | 1-2 y   | 0.33 | 2.98 | 0.53 | 1.44 | 0.04 | 0.16 | 0.13 | 0.51 | 0.06 | 0.37 | 0.12 | 0.69 | 0.46 | 1.21 | 1.88 | 9.92  |
|       | 2-3 y   | 0.33 | 2.98 | 0.53 | 1.44 | 0.04 | 0.16 | 0.13 | 0.51 | 0.06 | 0.37 | 0.12 | 0.69 | 0.46 | 1.21 | 1.88 | 9.92  |
|       | 3-6 y   | 0.26 | 2.33 | 0.41 | 1.13 | 0.03 | 0.13 | 0.11 | 0.40 | 0.05 | 0.29 | 0.09 | 0.54 | 0.36 | 0.95 | 1.47 | 7.77  |
|       | 6-11 y  | 0.20 | 1.81 | 0.32 | 0.88 | 0.03 | 0.10 | 0.08 | 0.31 | 0.04 | 0.22 | 0.07 | 0.42 | 0.28 | 0.74 | 1.14 | 6.04  |
|       | 11-16 y | 0.14 | 1.29 | 0.23 | 0.63 | 0.02 | 0.07 | 0.06 | 0.22 | 0.03 | 0.16 | 0.05 | 0.30 | 0.20 | 0.53 | 0.82 | 4.31  |
|       | 16-18 y | 0.13 | 1.16 | 0.21 | 0.56 | 0.02 | 0.06 | 0.05 | 0.20 | 0.03 | 0.14 | 0.05 | 0.27 | 0.18 | 0.47 | 0.73 | 3.88  |
|       | 18-21 y | 0.13 | 1.16 | 0.21 | 0.56 | 0.02 | 0.06 | 0.05 | 0.20 | 0.03 | 0.14 | 0.05 | 0.27 | 0.18 | 0.47 | 0.73 | 3.88  |
|       | <21 y   | 0.19 | 1.68 | 0.30 | 0.81 | 0.02 | 0.09 | 0.08 | 0.29 | 0.04 | 0.21 | 0.07 | 0.39 | 0.26 | 0.68 | 1.06 | 5.61  |
|       | 21-65 y | 0.20 | 1.81 | 0.32 | 0.88 | 0.03 | 0.10 | 0.08 | 0.31 | 0.04 | 0.22 | 0.07 | 0.42 | 0.28 | 0.74 | 1.14 | 6.04  |
| All y | 0.20    | 1.81 | 0.32 | 0.88 | 0.03 | 0.10 | 0.08 | 0.31 | 0.04 | 0.22 | 0.07 | 0.42 | 0.28 | 0.74 | 1.14 | 6.04 |       |

<sup>a</sup>N: Normal exposure scenario, median concentrations of PAEs were used.

<sup>b</sup>H: High exposure scenario, 90 percentiles of PAE concentrations were used.

M:

month;

y:

year.

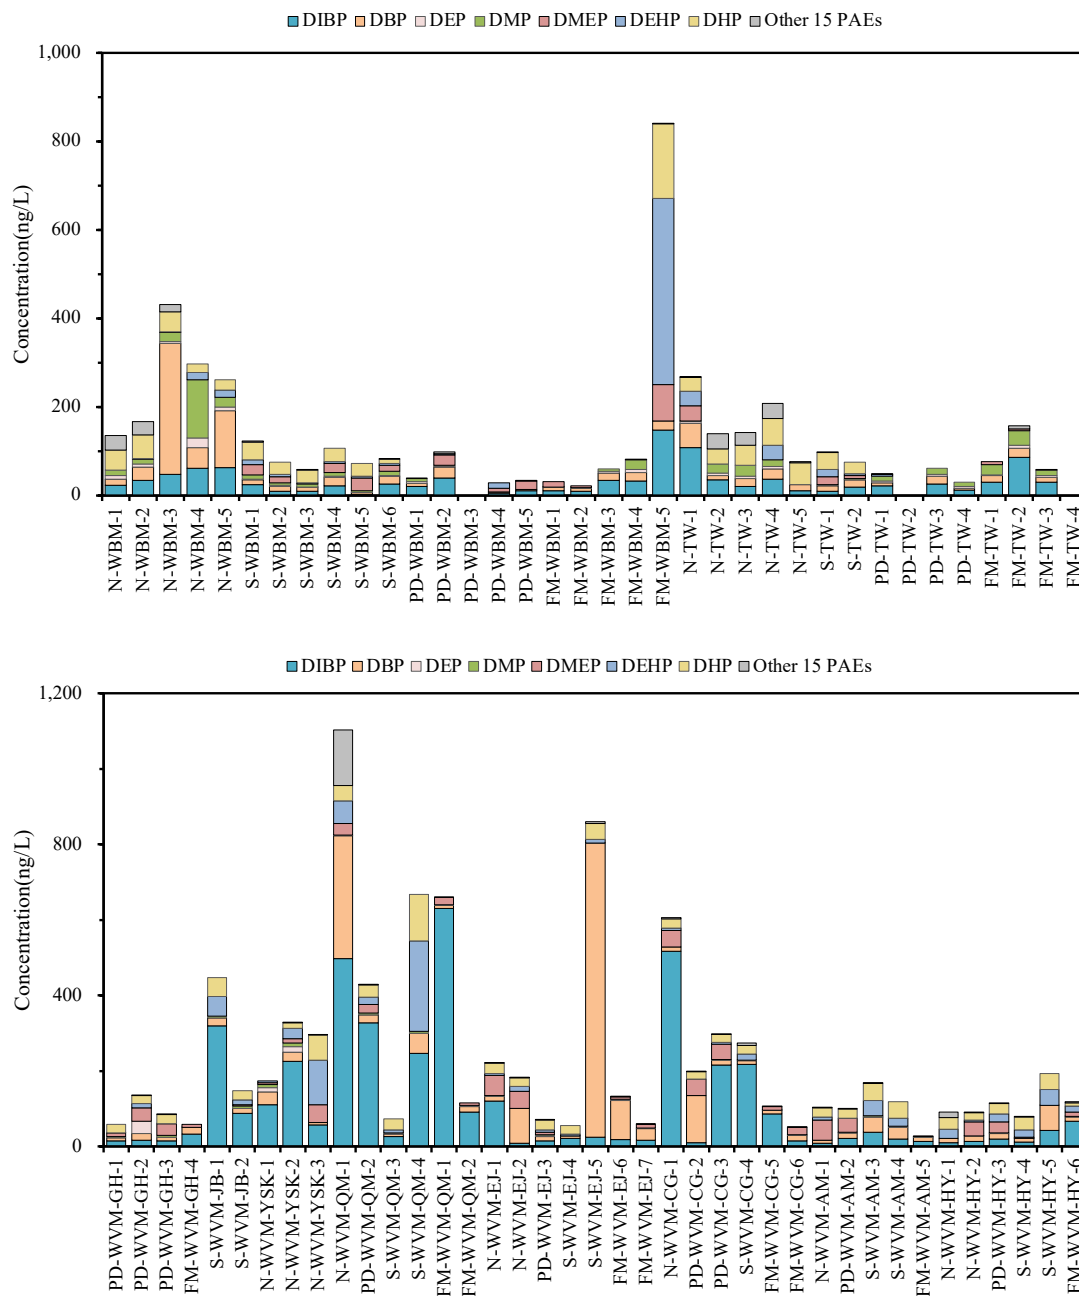

Fig. S1. Concentrations of PAEs in three types of samples.

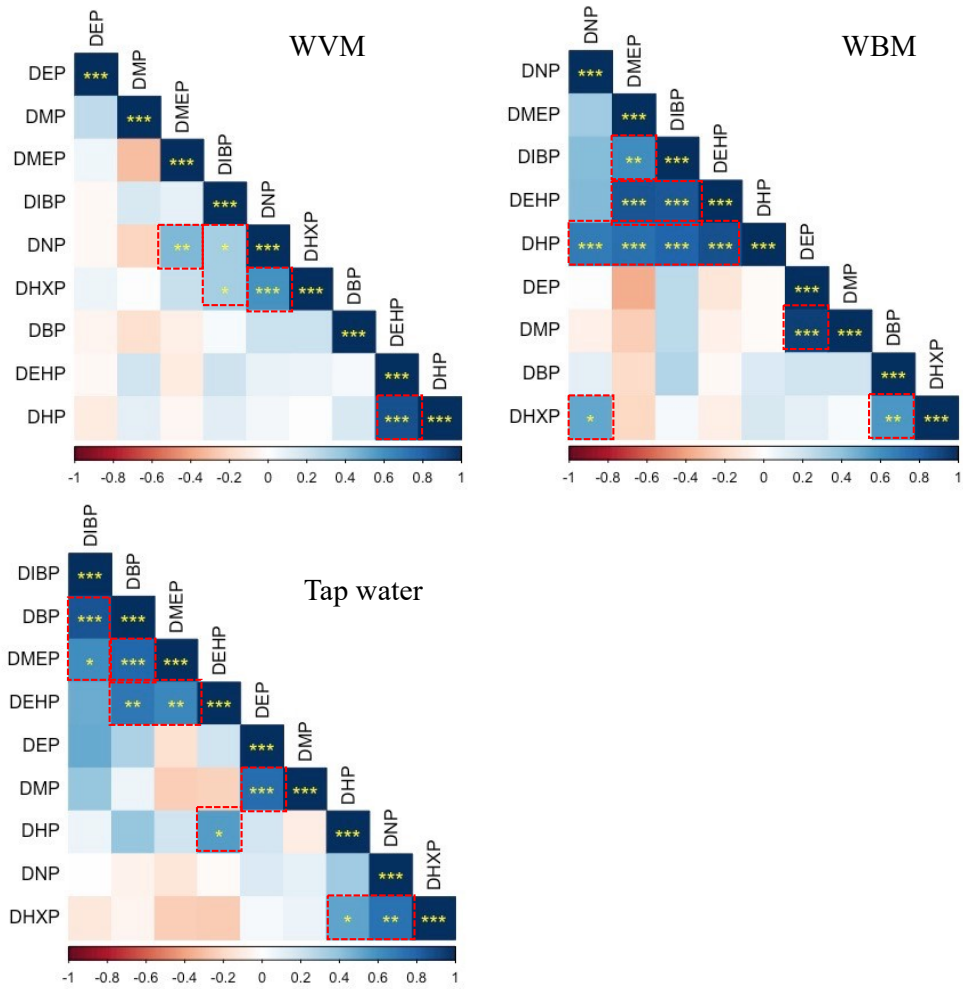

Fig. S2. Heatmap of the correlation matrix of PAEs in TW, WVM, and WBM samples (hollow square represent significant correlations).

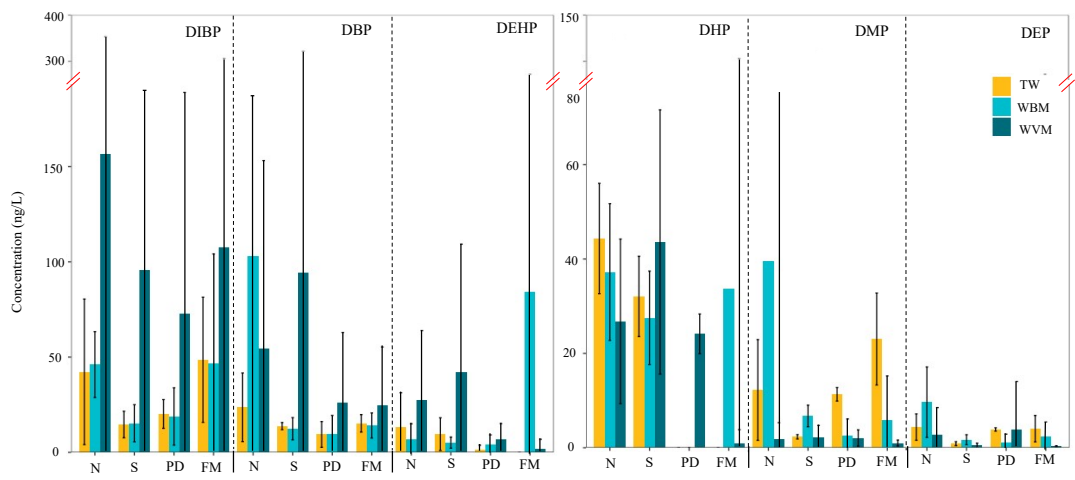

Fig. S3. Comparison of the individual PAE mean levels in TW, WBM, and WVM.

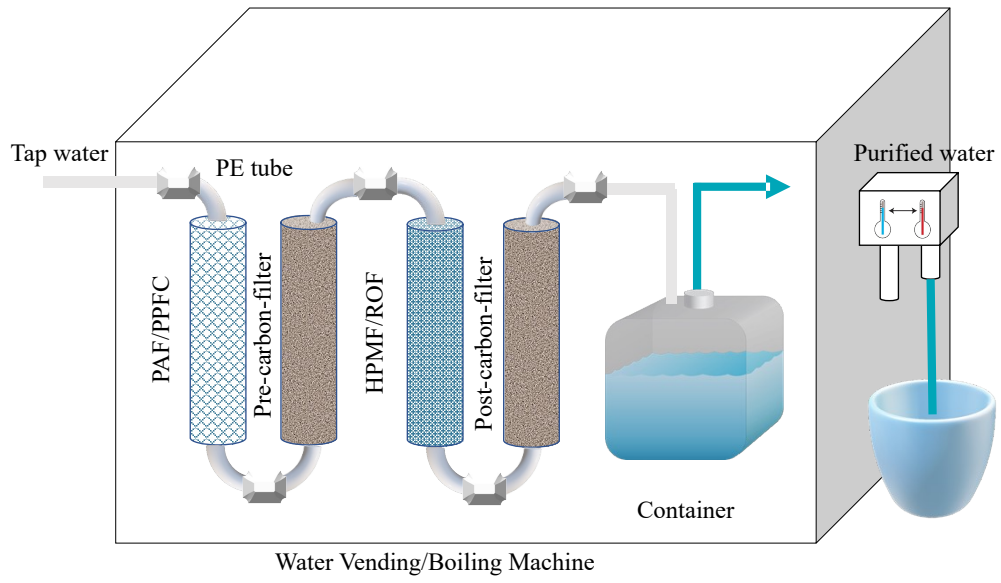

Fig. S4. Schematic diagram of purification processes inside water purifier.



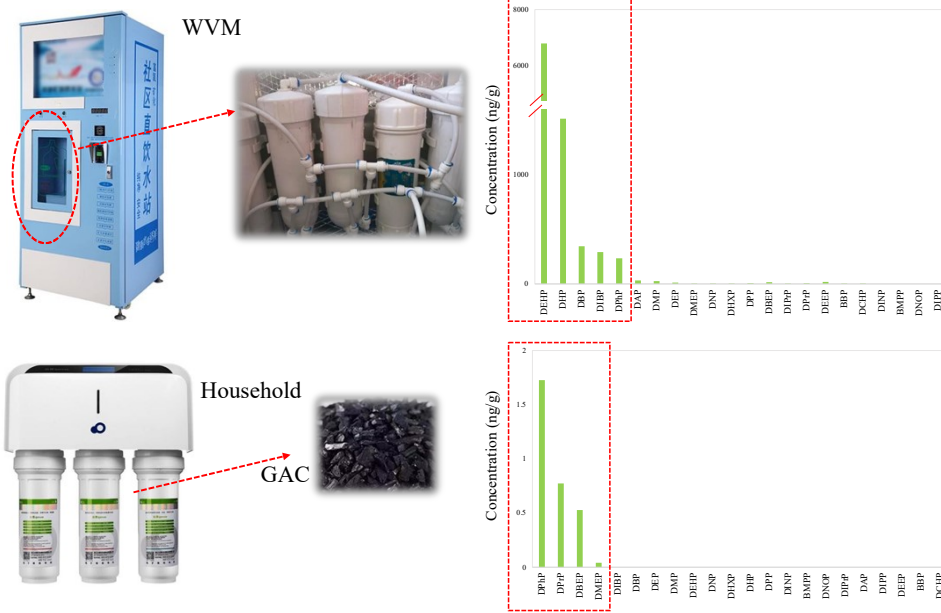

Fig. S5. PAE levels in materials (HPMF and GAC)

## Reference:

1. Y. C. Yang, X. L. Zhu, X. Cui, Y. Xue, S. K. Tang, Determination of phthalate esters in textiles by solid phase extraction and gas chromatography-mass spectrometry, *Analyt Lett*, 2015, 48, 2544-2552.
2. K. M. Gani, A. A. Kazmi, Phthalate contamination in aquatic environment: A critical review of the process factors that influence their removal in conventional and advanced wastewater treatment, *Environ Sci Technol*, 2016, 46, 1402-1439.
3. PubChem. National Library of Medicine; National Institutes of Health. USA.gov. Available from <https://pubchem.ncbi.nlm.nih.gov/>
4. CompTox Chemicals Dashboard Help: Chemical Search. Available from <https://comptox.epa.gov/dashboard/dsstoxdb/results?search=DTXSID9020112>
5. USEPA, 2011. U.S. Environmental Protection Agency. Exposure Factors Handbook, 2011 ed.; U.S. Environmental Protection Agency: Washington, DC, USA.
